# Supplementary material for: Characterization of the transporterB0AT3 (Slc6a17) in the rodent central nervous system
Source: PubMed Central journal article supplement (PMC3689596; doi:10.1186/1471-2202-14-54), 2013-05-14
Supplement: 1471-2202-14-54-S1.pdf [file 1471-2202-14-54-S1.pdf]

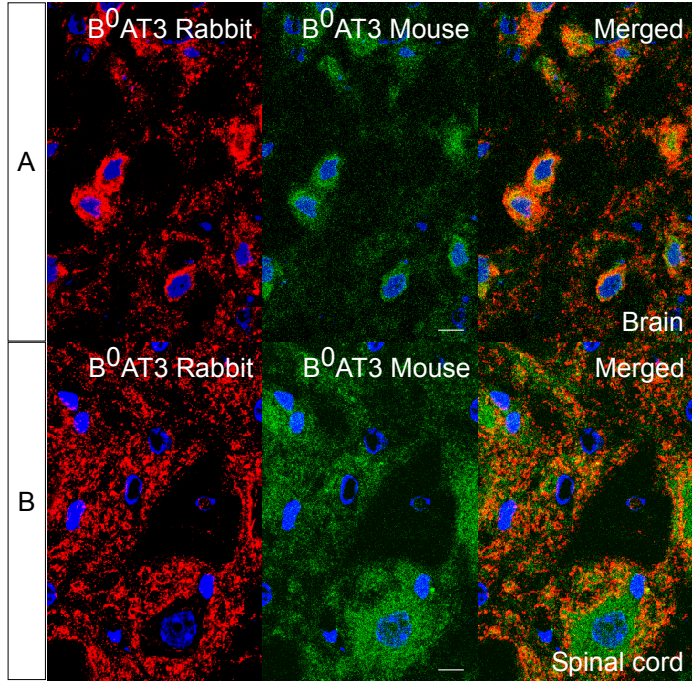

Supplementary Figure 1.

### **Supplementary Figure 1.**

Characterization of the B<sup>0</sup>AT3 antibody. The antibody specificity was investigated by immunohistochemistry on mouse CNS tissues. Double immunohistochemistry with the custom made polyclonal B<sup>0</sup>AT3 antibody made in rabbit (red) and the commercial available B<sup>0</sup>AT3 antibody made in mouse (green) on brain (row A) and spinal cord (row B) tissue. The cell nucleus marker DAPI was stained in blue. **(A)** Co-localization of B<sup>0</sup>AT3 antibodies in cells in cerebral cortex in brain (Bregma -1.06). **(B)** Co-localization of B<sup>0</sup>AT3 antibodies in motor neurons and other cells in spinal cord (L2). Scale bar: 10 μm. The immunohistochemistry indicated that the custom made polyclonal B<sup>0</sup>AT3 antibody was epitope specific.

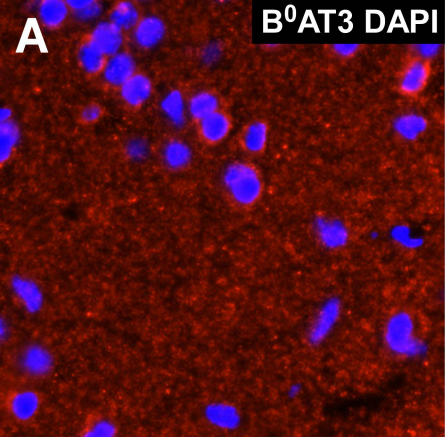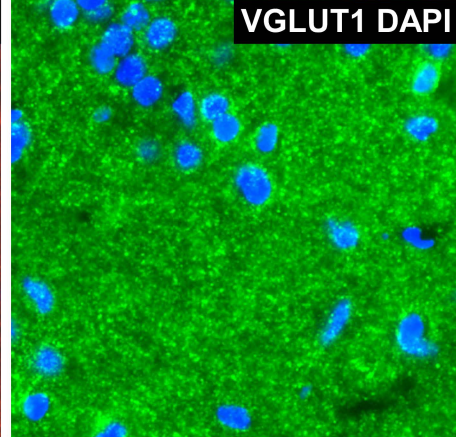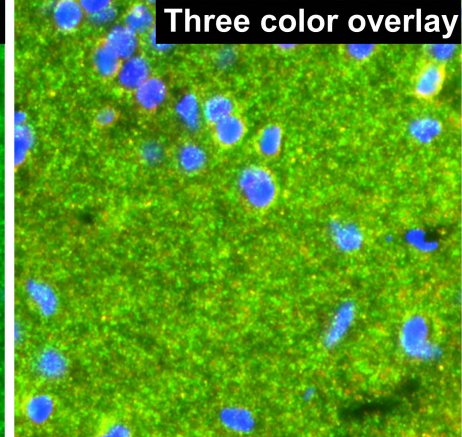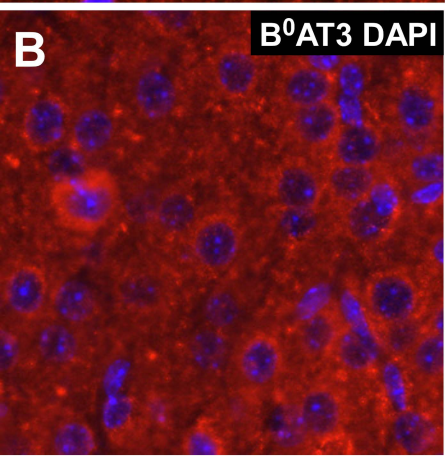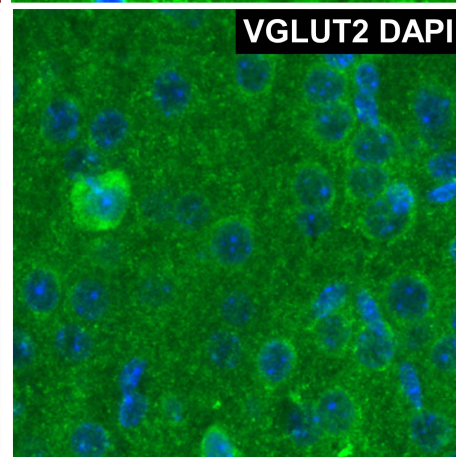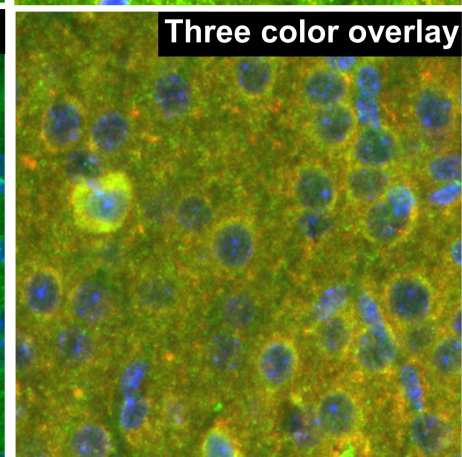

## **Supplementary Figure 2.**

Protein localization of B<sup>0</sup>AT3 to glutamatergic neurons and vesicles. Red staining is B<sup>0</sup>AT3, green staining is VGLUT1 and VGLUT2 respectively and blue is DAPI. **(A)** Overlapping expression between B<sup>0</sup>AT3 and VGLUT1 in cerebral cortex in the brain. **(B)** Overlapping expression for the vesicular marker VGLUT2 and B<sup>0</sup>AT3 in in cerebral cortex in the brain.

**Supplementary Table 1.** CNS expression of *Slc6a17* mRNA in mouse brain. The scale of estimated *Slc6a17* mRNA expression in the table; (+++) high expression, (++) medium expression, (+) low expression, and (-) not detected.

| <b>Tissue</b>                                           | <b><i>Slc6a17</i> expression</b> |
|---------------------------------------------------------|----------------------------------|
| <b>Striatum</b>                                         |                                  |
| Caudate putamen (striatum) (CPu)                        | +                                |
| Nucleus accumbens, core (NAccC)                         | +                                |
| <b>Septum</b>                                           |                                  |
| Lateral septal nucleus, dorsal part (LSD)               | +++                              |
| Lateral septal nucleus, intermediate part (LSI)         | +++                              |
| Lateral septal nucleus, ventral part (LSV)              | ++                               |
| Septofimbrial nucleus (SFi)                             | ++                               |
| Ventral pallidum (VP)                                   | ++                               |
| Medial forebrain bundle (mfb)                           | ++                               |
| Olfactory tubercle (Tu)                                 | ++                               |
| Nucleus of the vertical limb of the diagonal band (VDB) | +                                |
| Islands of Calleja (ICj)                                | ++                               |
| <b>Hippocampus</b>                                      |                                  |
| Pyramidal cell layer of the hippocampus (Py)            | +++                              |
| Granule cell layer of the dentate gyrus (GrDG)          | +++                              |
| <b>Cerebral cortex</b>                                  |                                  |
| Layer 1                                                 | -                                |
| Layer 2                                                 | ++                               |
| Layer 3                                                 | ++                               |
| Layer 4                                                 | +                                |
| Layer 5                                                 | +++                              |
| Layer 6                                                 | +                                |

|                                                               |     |
|---------------------------------------------------------------|-----|
| Piriform cortex (Pir)                                         | +++ |
| Indusium griseum (IG)                                         | +++ |
| Thalamus                                                      |     |
| Medial habenular nucleus (MHb)                                | ++  |
| Lateral habenular nucleus (LHb)                               | ++  |
| Mediodorsal thalamic nucleus (MD)                             | ++  |
| Laterodorsal thalamic nucleus, dorsomedial part (LDDM)        | ++  |
| Laterodorsal thalamic nucleus, ventrolateral part (LDVL)      | +   |
| Central medial thalamic nucleus (CM)                          | +   |
| Ventromedial thalamic nucleus (VM)                            | +   |
| Ventrolateral thalamic nucleus (VL)                           | +   |
| Ventral posteromedial thalamic nucleus (VPM)                  | +   |
| Reticular thalamic nucleus (Rt)                               | +   |
| Bed nucleus of the stria terminalis (BNST)                    | ++  |
| Submedius thalamic nucleus (Sub)                              | ++  |
| Zona incerta (ZI)                                             | +   |
| Hypothalamus                                                  |     |
| Septohypothalamic nucleus (SHy)                               | ++  |
| Dorsomedial hypothalamic nucleus (DMH)                        | ++  |
| Ventromedial hypothalamic nucleus, dorsomedial part (VMHDM)   | +++ |
| Ventromedial hypothalamic nucleus, central part (VMHC)        | ++  |
| Ventromedial hypothalamic nucleus, ventrolateral part (VMHVL) | ++  |
| Lateral hypothalamus (LH)                                     | ++  |
| Arcuate hypothalamic nucleus (Arc)                            | +++ |
| Paraventricular hypothalamic nucleus (Pa)                     | +   |
| Anterior hypothalamic area, posterior part (AHP)              | +   |
| Amygdala                                                      |     |

|                                                             |     |
|-------------------------------------------------------------|-----|
| Lateral amygdaloid nucleus, dorsolateral part (LaDL)        | ++  |
| Lateral amygdaloid nucleus, ventrolateral part (LaVL)       | ++  |
| Basolateral amygdaloid nucleus, anterior part (BLA)         | +++ |
| Basolateral amygdaloid nucleus, ventral part (BLV)          | +++ |
| Bed nucleus of the stria terminalis, intraamygdaloid (STIA) | +++ |
| Basomedial amygdaloid nucleus, anterior part (BMA)          | ++  |
| Dorsal endopiriform nucleus (DEn)                           | ++  |
| Ventral endopiriform claustrum (VEn)                        | ++  |
| Medial amygdaloid nucleus, posterodorsal part (MePD)        | +   |
| Medial amygdaloid nucleus, posteroventral part (MePV)       | +   |
| Central amygdaloid nucleus (Ce)                             | +   |
| <b>Pons</b>                                                 |     |
| Lateral parabrachial nucleus (LPB)                          | +   |
| Medial parabrachial nucleus (MPB)                           | ++  |
| Locus coeruleus (LC)                                        | ++  |
| Barrington's nucleus (Bar)                                  | ++  |
| Laterodorsal tegmental nucleus (LDTg)                       | +   |
| <b>Cerebellum</b>                                           |     |
| Purkinje layer of cells                                     | ++  |
| Spinal cord                                                 | +   |

---
